# Supplementary material for: Reducing the serine availability complements the inhibition of the glutamine metabolism to block leukemia cell growth
Source: PubMed Central journal article supplement (PMC4811496; doi:10.18632/oncotarget.6426), 2015-11-28
Supplement: oncotarget-07-1765-s001.pdf [file oncotarget-07-1765-s001.pdf]

## Reducing the serine availability complements the inhibition of the glutamine metabolism to block leukemia cell growth

### Supplementary Materials

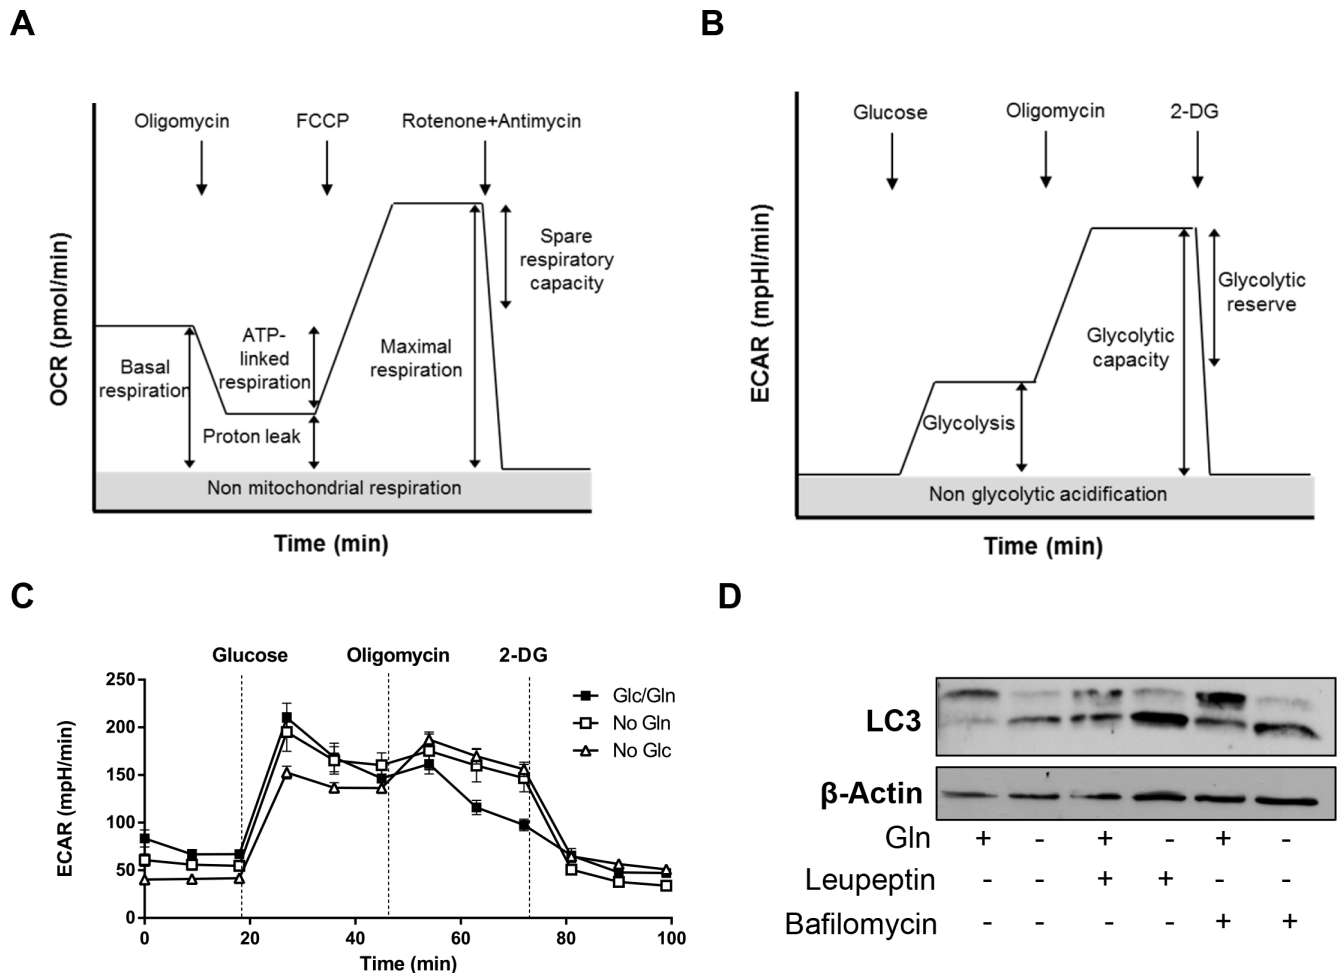

**Supplementary Figure S1: Seahorse-based metabolic profiling and autophagy detection in Gln-deprived HL-60 leukemia cells.** (A) The oxygen consumption rate (OCR) is measured, first without any drugs to determine the basal respiration. The injection of oligomycin, an inhibitor of ATP synthase, helps to calculate the ATP-linked respiration and the proton leak. The FCCP injection reveals the maximal respiration while rotenone (complex I inhibitor) and antimycin (complex III inhibitor) are used to determine the non-mitochondrial  $O_2$  consumption. (B) Measurement of the extracellular acidification rate (ECAR) upon glucose injection allows to evaluate glycolysis. The ECAR difference before and after oligomycin injection reflects the glycolytic reserve. Further to 2-DG (a glycolysis inhibitor) injection, the non-glycolytic ECAR can be calculated. (C) ECAR measurements of HL-60 pre-cultured in the presence of both Gln and glucose, in the absence of Gln and in the absence of glucose. (D) Representative LC3I and LC3II immunoblotting experiments from HL-60 cultured with or without Gln. This experiment was repeated twice with similar results.

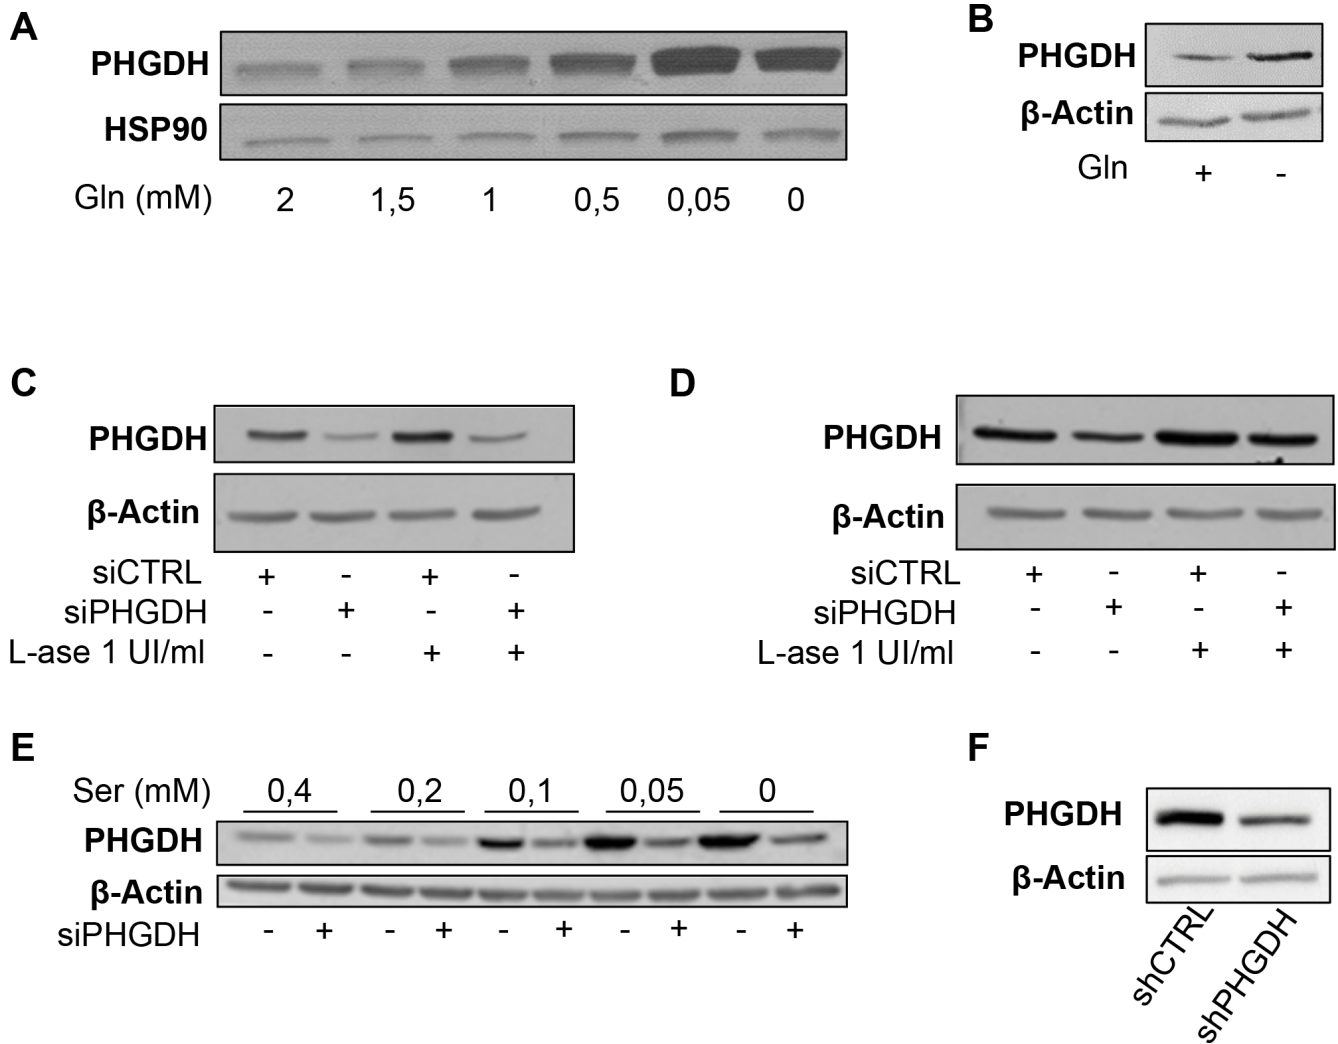

**Supplementary Figure S2: PHGDH expression in leukemia cells in response to Gln deprivation or PHGDH silencing.** Representative immunoblots (A) in THP-1 leukemia cells incubated for 48 hours in medium containing the indicated decreasing concentrations of Gln and (B) in K-562 leukemia cells cultured with or without Gln. Representative immunoblots depicting the effects of L-asparaginase (and PHGDH siRNA treatment) in (C) KG1a and (D) MV4-11 leukemia cells. (E) Representative immunoblot depicting the effects of 48h serine deprivation (and PHGDH siRNA treatment) in HL-60 leukemia cells. (F) Representative immunoblot depicting the effects of a PHGDH shRNA in HL-60 leukemia cells.

**A**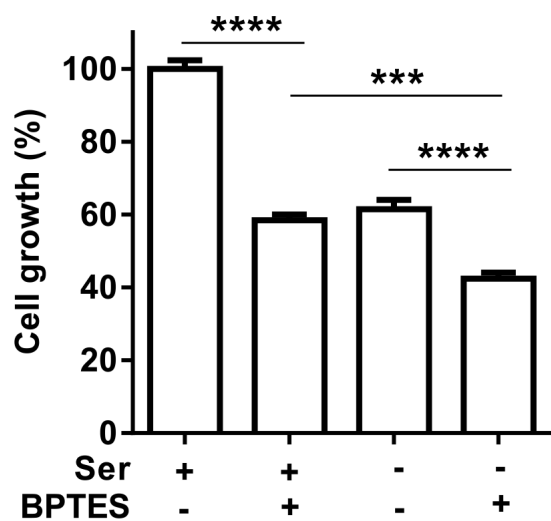**B**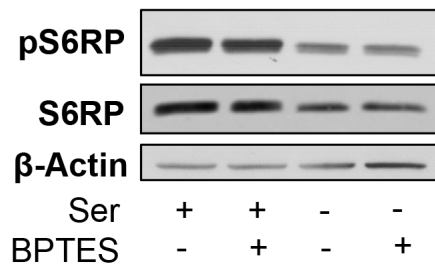**C**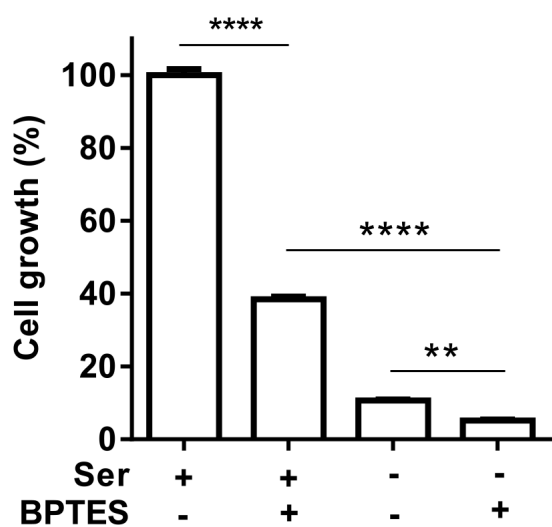**D**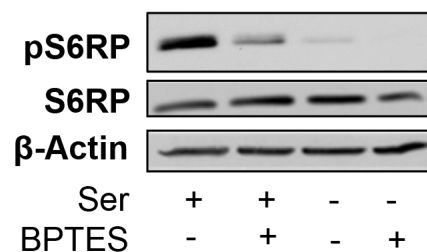

Supplementary Figure S3: Effects of serine deprivation and/or treatment with the glutaminase inhibitor BPTES on HL-60 and Ba/F3 leukemia cells. Bar graphs represent the growth (%) of (A) HL-60 and (C) Ba/F3 cells after 48 hours of the indicated treatments. Representative immunoblots depicting the extent of phospho-S6RP in corresponding (B) HL-60 and (D) Ba/F3 cells.
